# Supplementary material
Source: PubMed Central journal article supplement (PMC2572962)
Supplement: 0804248105_0804248105SI.pdf [file 0804248105_0804248105SI.pdf]

# Supporting Information

van den Broek *et al.* 10.1073/pnas.0804248105

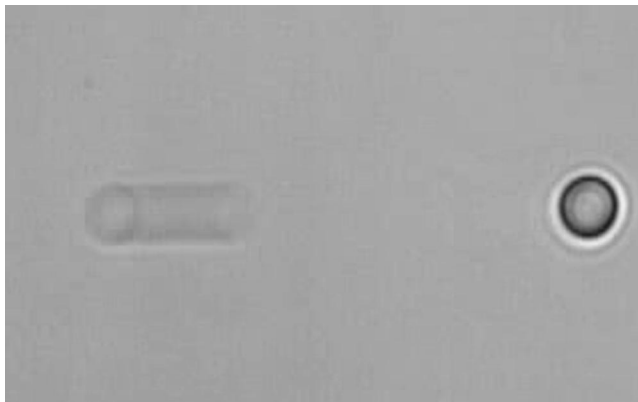

**Movie S1.** Rapid periodic stretching of a lambda phage DNA molecule between two optically trapped beads, as used for cleavage detection of DNA in nonstretched configurations..

[Movie S1 \(MOV\) <sup>1</sup>](#)

## Other Supporting Information Files

[SI Appendix \(PDF\)](#)
